# Supplementary material for: Neural mechanisms of expert persuasion on willingness to pay for sugar
Source: Frontiers journal article supplement (doi:10.3389/fnbeh.2023.1147140), 2023-03-13
Supplement: Data_Sheet_1.pdf [file Data_Sheet_1.pdf]

## ***Supplementary Material***

### **Neural mechanisms of expert persuasion on willingness to pay for sugar**

**Ioannis Ntoumanis<sup>\*,1</sup>, Alina Davidova<sup>1</sup>, Julia Sheronova<sup>1</sup>, Ksenia Panidi<sup>1</sup>, Vladimir Kosonogov<sup>1</sup>, Anna Shestakova<sup>1</sup>, Iiro P. Jääskeläinen<sup>1,2</sup>, Vasily Klucharev<sup>1</sup>**

\* Correspondence: Ioannis Ntoumanis, [iannisntoumanis@yahoo.com](mailto:iannisntoumanis@yahoo.com)

## Supplementary Figures

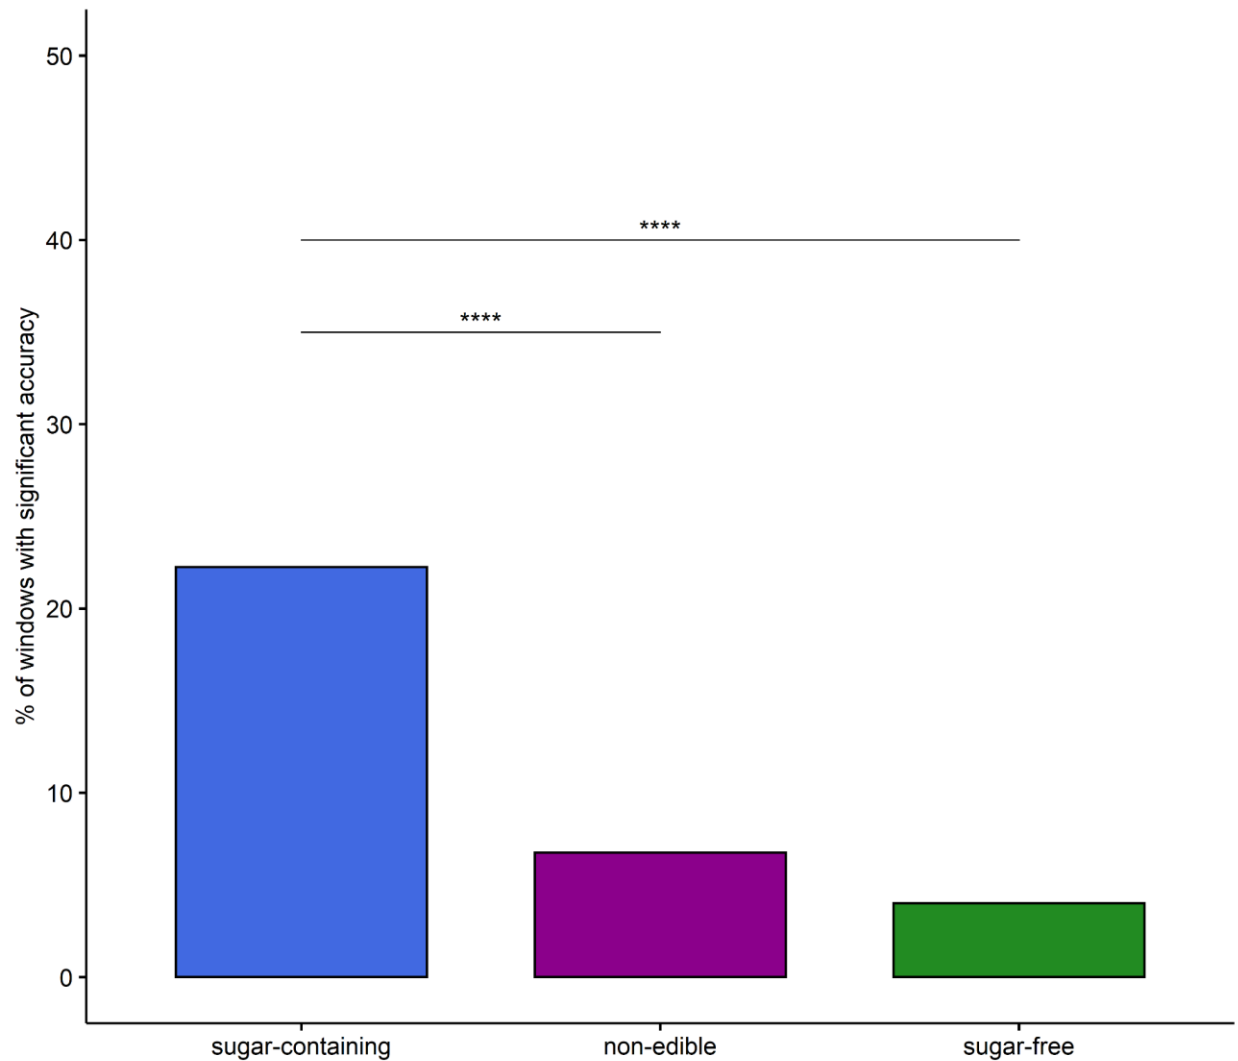

**Supplementary Figure 1.** Percentage of time windows where the classification accuracy of the MVPA was statistically significant. The proportions for the conditions sugar-containing, non-edible and sugar-free were 22.25%, 6.75% and 4.00%, respectively.

## Supplementary Tables

### Supplementary Table 1

Scores in the personality questionnaires.

|                                                          | Mean | Actual range | Possible range |
|----------------------------------------------------------|------|--------------|----------------|
| Conformity                                               | 4.46 | 2.18 - 7.36  | 1 - 9          |
| Consumer susceptibility to interpersonal influence scale | 3.45 | 1.08 - 5.42  | 1 - 7          |
| Extraversion                                             | 2.93 | 1.47 - 4.20  | 1 - 5          |
| Openness                                                 | 3.81 | 2.73 - 4.53  | 1 - 5          |
| Agreeableness                                            | 3.47 | 2.20 - 4.33  | 1 - 5          |
| Neuroticism                                              | 3.23 | 1.13 - 4.73  | 1 - 5          |
| Conscientiousness                                        | 3.23 | 1.27 - 4.47  | 1 - 5          |

### Supplementary Table 2

Relationship between participant characteristics and change in willingness to pay for sugar-containing products after listening to the healthy eating call. The numbers in the cell denote the Spearman's correlation coefficient. \* $p < .05$ , \*\*\* $p < .001$ .

|                                                          | sugar-containing | non-edible | sugar-free |
|----------------------------------------------------------|------------------|------------|------------|
| Age                                                      | .02              | .10        | .08        |
| BMI                                                      | -.21             | -.24       | .11        |
| Social conformity                                        | -.30*            | -.16       | -.10       |
| Consumer susceptibility to interpersonal influence scale | -.04             | .09        | .07        |
| Openness                                                 | -.13             | .08        | .04        |
| Agreeableness                                            | .15              | .21        | -.27       |
| Conscientiousness                                        | -.26             | .12        | -.06       |
| Neuroticism                                              | -.27             | -.51***    | .016       |
| Extraversion                                             | .13              | .25        | -.05       |

*Note: We also examined whether the change in WTP for each product category was different between participants with different levels of education. Three ANOVA were conducted (one for each condition) with Education as a between-subjects factor, but none of them showed a significant relationship between education and change in WTP (all  $ps > .05$ ).*
